# Supplementary material for: Maintaining the momentum in cryoEM for biological discovery
Source: Royal Society of Chemistry journal article supplement (doi:10.1039/d2fd00129b), 2022-01-01
Supplement: d2fd00129b1.pdf [file d2fd00129b1.pdf]

Supplementary

| Detector  | Manufacturer    | Sensor size   | Pixel size (um) | Frame rate Hz | DQE Peak (300 kV) |
|-----------|-----------------|---------------|-----------------|---------------|-------------------|
| Falcon 1  | TFS             | 4,096 x 4,096 | 14x14           | 18            | 0.35              |
| Falcon 2  | TFS             | 4,096 x 4,096 | 14x14           | 18            | 0.4               |
| Falcon 3  | TFS             | 4,096 x 4,096 | 14x14           | 40            | 0.7               |
| Falcon 4  | TFS             | 4,096 x 4,096 | 14x14           | 250           | 0.9               |
| Falcon 4i | TFS             | 4,096 x 4,096 | 14x14           | 320           | 0.92              |
| K2        | Gatan           | 3,840 x 3,712 | 5x5             | 400           | 0.85              |
| K3        | Gatan           | 5,760 x 4,092 | 5x5             | 1500          | 0.87              |
| DE-12     | Direct Electron | 4,096 x 3,072 | 6x6             | 40            | 0.35              |
| DE-16     | Direct Electron | 4,096 x 4,096 | 6.5x6.5         | 92            | 0.9               |
| DE-20     | Direct Electron | 5,120 x 3,840 | 6.4x6.4         | 32            | 0.8               |
| DE-64     | Direct Electron | 8,192 x 8,192 | 6.5x6.5         | 42            | 0.9               |

|                          | Probability of failure | Probability of occurrence | Normalised probability | For every 10 projects, fails at screening | % projects | Revised number of failed projects (in 100) | Failure microscope (hours/100 attempts) | Failed 'working' (hours/100 attempts) | Failed 'out of hours' (hours/100 attempts) | Successful (hours/100 attempts) | Successful 'working' (hours/100 attempts) | Successful 'out of hours' (hours/100 attempts) | Failed hours normalised to % of projects | Successful hours to % of projects | Failed 'working' hours normalised to % of projects | Failed 'out of hours' normalised to % of projects | Successful 'working' hours normalised to % of projects | Successful 'out of hours' normalised to % of projects | Total working hour/100 projects | Total out of hour/100 projects | Total hour/100 projects |
|--------------------------|------------------------|---------------------------|------------------------|-------------------------------------------|------------|--------------------------------------------|-----------------------------------------|---------------------------------------|--------------------------------------------|---------------------------------|-------------------------------------------|------------------------------------------------|------------------------------------------|-----------------------------------|----------------------------------------------------|---------------------------------------------------|--------------------------------------------------------|-------------------------------------------------------|---------------------------------|--------------------------------|-------------------------|
| Low                      | 0.2                    | 0.15                      | 0.03                   | 2                                         | 15         | 20                                         | 480                                     | 160                                   | 320                                        | 1920                            | 640                                       | 1280                                           | 72                                       | 288                               | 24                                                 | 48                                                | 96                                                     | 192                                                   |                                 |                                |                         |
| Medium                   | 0.5                    | 0.6                       | 0.3                    | 5                                         | 60         | 50                                         | 200                                     | 200                                   | 0                                          | 1400                            | 400                                       | 1000                                           | 120                                      | 840                               | 30                                                 | 0                                                 | 60                                                     | 150                                                   |                                 |                                |                         |
| High                     | 0.8                    | 0.15                      | 0.12                   | 8                                         | 15         | 80                                         | 640                                     | 640                                   | 0                                          | 640                             | 320                                       | 320                                            | 80                                       | 96                                | 96                                                 | 0                                                 | 48                                                     | 48                                                    |                                 |                                |                         |
| Variable                 | 0.6                    | 0.1                       | 0.06                   | 6                                         | 10         | 60                                         | 2880                                    | 480                                   | 2400                                       | 2880                            | 960                                       | 1920                                           | 288                                      | 288                               | 72                                                 | 360                                               | 144                                                    | 288                                                   |                                 |                                |                         |
| Sum                      |                        |                           | <b>0.61</b>            |                                           |            |                                            |                                         |                                       | <b>2720</b>                                | <b>6840</b>                     | <b>2320</b>                               | <b>4520</b>                                    | <b>576</b>                               | <b>1512</b>                       | <b>222</b>                                         | <b>408</b>                                        | <b>348</b>                                             | <b>678</b>                                            | <b>676</b>                      | <b>1086</b>                    | <b>1656</b>             |
| Fixed (manual screening) | 0.5                    |                           |                        | 5                                         | 100        | 50                                         | 1000                                    | 600                                   | 400                                        | 1000                            | 600                                       | 400                                            | 1000                                     | 1000                              | 600                                                | 400                                               | 600                                                    | 400                                                   | 1200                            | 800                            | 2000                    |

Table S1- Properties of direct electron detector technology [31-40]

Table S2- Scheduling based on probability of project success results in less 'failed' microscope time compared with a fixed scheduling of projects.
