# Supplementary material for: Maintaining the momentum in cryoEM for biological discovery
Source: Royal Society of Chemistry journal article supplement (doi:10.1039/d2fd00129b), 2022-01-01
Supplement: d2fd00129b2.xlsx [file d2fd00129b2.xlsx]

## Sheet: Sheet1
	Probability of faliure	Probability of occrance	Normalised probability	For every 10 projects, fails at screening	% projects	Revised number of failed projects (in 100)	Faliure microscope (hours/100 attempts)	Failed 'working' (hours/100 attempts)	Failed 'out of hours' (hours/100 attempts)	Successful (hours/100 attempts)	Successful 'working' (hours/100 attempts)	Successful 'out of hours' (hours/100 attempts)	Failed hours normalised to % of projects	Successful hours to % of projects	Failed 'working hours' normalised to % of projects	Failed 'out of hours' normalised to % of projects	Successful 'working' hours normalised to % projects	Successful 'out of hours' hours normalised to % projects	Total working hours/100 projects	Total out of hours/100 projects	Total hours/100 projects
Low	0.2	0.15	0.03	2	15	20	480	160	320	1920	640	1280	72	288	24	48	96	192
Medium	0.5	0.6	0.3	5	60	50	200	200	0	1400	400	1000	120	840	30	0	60	150
High	0.8	0.15	0.12	8	15	80	640	640	0	640	320	320	96	96	96	0	48	48
Variable	0.6	0.1	0.06	6	10	60	2880	480	2400	2880	960	1920	288	288	72	360	144	288
Sum			0.51						2720	6840	2320	4520	576	1512	222	408	348	678	570	1086	1656
Fixed (manual screening)	0.5			5	100	50	1000	600	400	1000	600	400	1000	1000	600	400	600	400	1200	800	2000
*Fixed= 8h screening followed by 50% chance of this looking ok manually to proceed then assuming 100% of collections successful
